# Supplementary material
Source: ML conference proceedings conference paper supplement (https://openreview.net/forum?id=SWRFC2EupO)
Supplement: supplementary_material [file attachment]

## A MASKED WORLD MODELS

For our experiments, we use Masked World Models (MWM) (Seo et al., 2022) as our underlying RL algorithm. MWM is a model-based RL framework that aims to decouple visual representation learning and dynamics learning. In contrast to prior algorithms that learn world models in an end-to-end manner, MWM separately learns a visual encoder via masked autoencoding (He et al., 2021) and a world model that reconstructs frozen autoencoder representations. We build LAMP upon the official implementation provided by authors (<https://github.com/younggyoseo/MV-MWM>) which supports experimentation on RLBench (James et al., 2020). In Table 7, 8, and 9 we provide all relevant hyperparameters.

## B VIDEO-LANGUAGE MODELS

**R3M** For the R3M (Nair et al., 2022) VLM in LAMP, we use the official implementation (<https://github.com/facebookresearch/r3m>). We use the ResNet-18 visual backbone and preserve all default hyperparameters. To encode the language prompts, we use the DistilBERT ‘base-uncased’ model (<https://huggingface.co/distilbert-base-uncased>) from the transformers (<https://pypi.org/project/transformers/>) package as used in the R3M implementation.

**InternVideo** For the InternVideo (Wang et al., 2022) VLM in LAMP we use the official implementation (<https://github.com/OpenGVLab/InternVideo>). We use the "B/16" model and pretrained weights provided by the authors for embedding the images and text.

For InternVideo (Wang et al., 2022) we match the style of alignment score computation used in training and inference. We use the following reward parameterization:

$$r_i = F_\phi([s_{i//8}, s_{2*i//8}, \dots, s_{8*i//8}]) \cdot L_\alpha(l). \quad (4)$$

where 8 frames evenly spaced from the agent’s entire history are featurized by the visual encoder  $F_\phi$ .

**ZeST** For the CLIP (Radford et al., 2021) VLM used in ZeST (Cui et al., 2022) for LAMP, we use the official OpenAI CLIP model (<https://github.com/openai/CLIP>). We use the "ViT-B/32" release of the CLIP visual encoder for embedding images and the CLIP text encoder for embedding language prompts.

## C EXPERIMENTAL DETAILS

### C.1 LANGUAGE PROMPTING TYPES

We ablate on 6 different prompt styles, with the structures defined in Section 6.1. To construct Prompt Style 1, we replace the [NOUN] in the Pick up the [NOUN]. prompt with the ShapeNet name. To construct Prompt Style 6, we sample from random Shakespeare phrases listed below. For the remaining Prompt Styles, we sample a verb structure, either IRRELEVANT or RELEVANT; and a noun, either RANDOM or SYNONYM. Both verb structures are included in Table 2. We include examples of random nouns and synonym nouns for a sample object; nouns and synonyms for all objects are omitted for space, but they can be found in the code.

Verb structures and synonyms were curated from ChatGPT, with filtering afterward to select most relevant verbs. Random nouns were taken from the synonyms. We provide the automatically generated language prompt datasets for each language prompting scheme used during LAMP pretraining. Prompts to ChatGPT are included in Table 1.

### C.2 SHAPENET OBJECTS

In Figure 9 we provide images of some of the ShapeNet object assets used in the pretraining environments.

Table 1: **Using an LLM to generate verb structures and nouns.** We query ChatGPT with prompts to create a set of diverse tasks.

| Generating Verb Structures                                                                                                                                                                                                                                                                                                                                                                                                                                             | Generating Synonyms                                                                   |
|------------------------------------------------------------------------------------------------------------------------------------------------------------------------------------------------------------------------------------------------------------------------------------------------------------------------------------------------------------------------------------------------------------------------------------------------------------------------|---------------------------------------------------------------------------------------|
| Give me a list of 40 task variations that present an interesting task for a person to do in a home or kitchen scenario.<br>Examples should not be complicated, and should be possible to do very quickly, within a minute or so. These should be simple tasks that are interesting and diverse, but EASY. Tasks should be atomic and very general.<br>For example:<br>1. Reach for the mug<br>2. Open the microwave<br>3. Wipe the table clean<br>4. Water the flowers | Please give me 40 synonyms for bowl<br>Example:<br>1. bowl<br>2. soup bowl<br>3. dish |

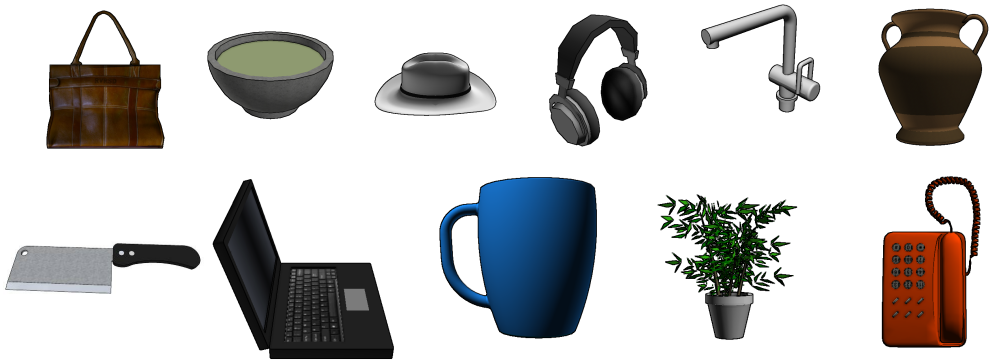

Figure 9: Examples of ShapeNet object assets used during the pretraining phase.

Table 2: **Verb Structures**. We include the different verb structures used during pretraining.

| Relevant Verb                                           | Irrelevant Verb                                 |
|---------------------------------------------------------|-------------------------------------------------|
| Pick up the [NOUN]                                      | The [NOUN] is seized                            |
| Lift the [NOUN] with your hands                         | The [NOUN] is clutched                          |
| Hold the [NOUN] in your grasp                           | The [NOUN] is gripped                           |
| Take hold of the [NOUN] and raise it                    | The [NOUN] is firmly grasped                    |
| Grasp the [NOUN] firmly and lift it up                  | The [NOUN] is tightly held                      |
| Raise the [NOUN] by picking it up                       | The [NOUN] is firmly caught                     |
| Retrieve the [NOUN] and hold it up                      | The [NOUN] is securely clasped                  |
| Lift the [NOUN] by gripping it                          | The [NOUN] is rotated                           |
| Seize the [NOUN] and raise it off the surface           | The [NOUN] has been flipped                     |
| Hold onto the [NOUN] and lift it up                     | The [NOUN] has been knotted                     |
| The [NOUN] is lifted up                                 | The [NOUN] has been folded                      |
| The [NOUN] is picked up off the ground                  | The [NOUN] has been rinsed                      |
| The [NOUN] is raised up by hand                         | The [NOUN] has been filled                      |
| The [NOUN] is grasped and lifted up                     | The [NOUN] is shaken                            |
| The [NOUN] is taken up by hand                          | The [NOUN] has been scooped                     |
| The [NOUN] is retrieved and lifted up                   | The [NOUN] is poured                            |
| The [NOUN] is lifted off its surface                    | The [NOUN] has been scrubbed                    |
| The [NOUN] is elevated by being picked up               | The [NOUN] is tilted                            |
| The [NOUN] is hoisted up by hand                        | The [NOUN] has been heated                      |
| The [NOUN] is scooped up and lifted                     | Reach for the [NOUN]                            |
| The [NOUN] is lifted by the hand                        | Grasp at the [NOUN]                             |
| The [NOUN] is grasped and picked up                     | Stretch out to touch the [NOUN]                 |
| The [NOUN] is raised by the palm                        | Move your arm towards the [NOUN]                |
| The [NOUN] is taken up by the fingers                   | Use the gripper to rinse the [NOUN]             |
| The [NOUN] is held and lifted up                        | Position the end effector to fold the [NOUN]    |
| The [NOUN] is lifted off the surface by the arm         | Reach out the robotic arm to wipe the [NOUN]    |
| The [NOUN] is picked up and held by the wrist           | Utilize the gripper to seize the [NOUN]         |
| The [NOUN] is scooped up by the palm and lifted         | Guide the robotic arm to obtain the [NOUN]      |
| The [NOUN] is elevated by the hand                      | Maneuver the end effector to lift up the [NOUN] |
| The [NOUN] is taken up by the fingers of the hand       | Extend your hand towards the [NOUN]             |
| The [NOUN] is grasped and raised                        | Reach out your hand to acquire the [NOUN]       |
| The [NOUN] is lifted by the gripper                     | Guide your arm to rotate the [NOUN]             |
| The end effector picks up the [NOUN]                    | Maneuver your hand to shake up the [NOUN]       |
| The arm lifts the [NOUN]                                | Flip the [NOUN]                                 |
| The [NOUN] is held aloft by the robotic hand            | Tap the [NOUN]                                  |
| The robotic gripper secures the [NOUN]                  | Fold the [NOUN]                                 |
| The [NOUN] is lifted off the surface by the robotic arm | Rotate the [NOUN]                               |
| The robotic manipulator seizes and elevates the [NOUN]  | Brush the [NOUN]                                |
| The robotic end effector clasps and hoists the [NOUN]   | Twist the [NOUN]                                |
| The [NOUN] is taken up by the robotic gripper           | Wipe the [NOUN]                                 |

Table 3: **Prompt Style 6.** Snippets from Shakespeare.

|                                                    |
|----------------------------------------------------|
| Holla, Barnardo.                                   |
| BARNARDO Say, what, is Horatio there?              |
| HORATIO A piece of him.                            |
| Welcome, Horatio.—Welcome, good Marcellus.         |
| HORATIO                                            |
| What, has this thing appeared again tonight?       |
| BARNARDO I have seen nothing.                      |
| MARCELLUS                                          |
| Horatio says 'tis but our fantasy                  |
| And will not let belief take hold of him           |
| Touching this dreaded sight twice seen of us.      |
| Therefore I have entreated him along               |
| With us to watch the minutes of this night,        |
| That, if again this apparition come,               |
| He may approve our eyes and speak to it.           |
| Tush, tush, 'twill not appear.                     |
| Sit down awhile,                                   |
| How now, Horatio, you tremble and look pale.       |
| Is not this something more than fantasy?           |
| What think you on 't?                              |
| At least the whisper goes so: our last king,       |
| Whose image even but now appeared to us,           |
| Was, as you know, by Fortinbras of Norway,         |
| Thereto prick'd on by a most emulate pride,        |
| Dared to the combat; in which our valiant Hamlet   |
| (For so this side of our known world esteemed him) |
| Did slay this Fortinbras, who by a sealed compact, |
| Well ratified by law and heraldry,                 |
| Did forfeit, with his life, all those his lands    |
| Which he stood seized of, to the conqueror.        |
| Against the which a moiety competent               |
| Was gag'd by our king, which had returned          |
| To the inheritance of Fortinbras                   |
| Had he been vanquisher, as, by the same comart     |
| And carriage of the article designed,              |
| His fell to Hamlet. Now, sir, young Fortinbras,    |
| Of unimprov'd mettle hot and full,                 |
| Hath in the skirts of Norway here and there        |
| Shar'd up a list of lawless resolute               |
| BARNARDO                                           |

Table 4: **Nouns**. Synonym and random nouns for "bag."

| Synonym Noun  | Random Noun |
|---------------|-------------|
| bag           | cap         |
| handbag       | hat         |
| purse         | snapback    |
| clutch        | faucet      |
| tote          | tap         |
| backpack      | vase        |
| knapsack      | flask       |
| satchel       | earphone    |
| shoulder bag  | earpiece    |
| duffel bag    | knife       |
| messenger bag | blade       |
| grip          | laptop      |
| briefcase     | notebook    |
| pouch         | vase        |
| fanny pack    | flowerpot   |
| drawstring    | telephone   |
| beach bag     | flip phone  |
| grocery shop  | handle      |
| shopping bag  | lever       |
| gift bag      | gift bag    |
| lunch bag     | lunch bag   |
| laptop bag    | laptop bag  |
| travel bag    | travel bag  |

### C.3 EGO4D TEXTURES

In Figure 10 we provide the textures extracted from Ego4D we overlayed on the pretraining environments.

### C.4 COMPUTE

We used a NVIDIA DGX A100 GPUs for all experimentation. Pretraining time for 300k steps takes 60-72 hours; finetuning for 100k takes 16-19 hours.

## D ADDITIONAL EXPERIMENTS AND ABLATIONS

### D.1 FINETUNING RESULTS WITH INSTRUCTION TUNING

We include additional finetuning results for the "Phone On Base" RLBench task in Figure 11. We find that by tuning the language instruction used to condition the model, we further increase performance. We provide results involving selecting a frozen language instruction from a set of many semantically similar generated instructions for finetuning. We consider 9 of these new generated prompts in addition to the original task name based prompt. We then select the language prompt corresponding to the policy that achieves the highest zero-shot evaluation return when rolled out. This simple tuning step provides us with increases in performance on the new "Phone on Base" task. The optimal instructions tuned for each of the three seeds include:

1. The arm is picking up the phone and placing it on the base
2. The robot arm grasps the phone and sets it down
3. The robot gripper picks up the phone and places it on the base

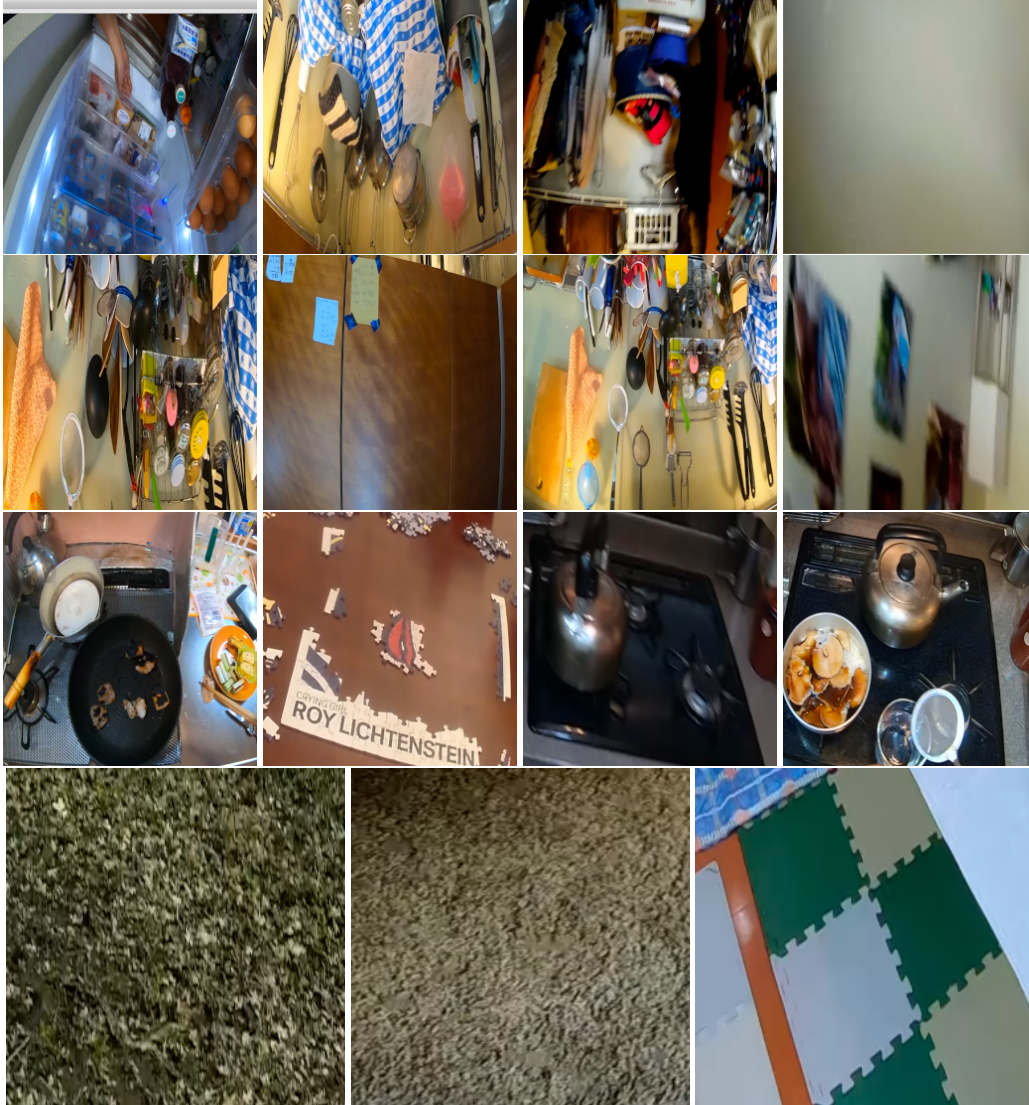

Figure 10: Textures cropped out of Ego4D videos and overlayed to the RL Bench scene. The textures on the first two rows were overlayed to the walls, those on the third row to the table, and those on the fourth row to the floor.

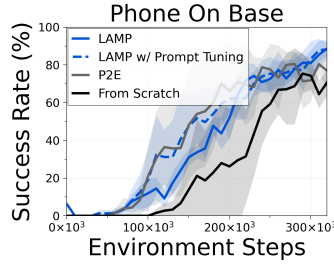

Figure 11: Finetuning Result on Phone On Base

## D.2 PRETRAINING PERFORMANCE

In our pretraining environment, we spawn ShapeNet objects and plot evaluation returns in Figure 12. The evaluation return is based on a shaped reward for reaching the object and grasping it. While the pretraining reward is noisy, it provides insight into the types of behaviors learned, and in particular, if exploration leads to high-reward behaviors. RND is the worst performing during pretraining, and LAMP learns higher-reward behaviors through the course of training.

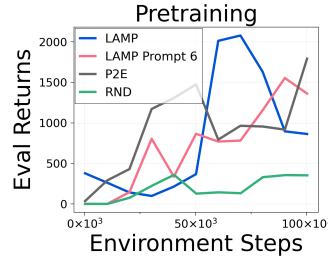

Figure 12: Pretraining Returns with different methods

### D.2.1 RANDOM NETWORK DISTILLATION

We experiment with Random Network Distillation (Burda et al., 2018), an additional unsupervised reinforcement learning algorithm, as an additional baseline and report results in 13. We find that for the "Pick Up Cup" and "Push Button" tasks Plan2Explore is a stronger baseline. While in the case for the "Take Lid Off Saucepan" task, RND does manage to outperform Plan2Explore, LAMP exhibits stronger performance than either baseline. We report all relevant hyperparameters in Table 10.

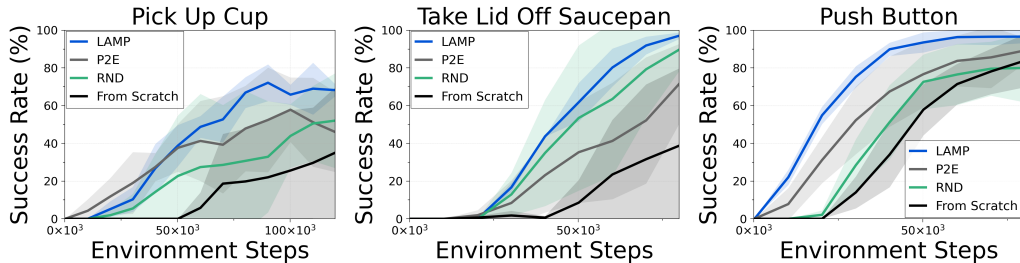

Figure 13: Finetuning performance on visual robotic manipulation tasks in RL Bench. The solid line and shaded region represent mean and standard deviation across 3 seeds.

## E HYPERPARAMETERS

Table 5: Plan2Explore Hyperparameters

| Parameter                        | Value                                                                                                             |
|----------------------------------|-------------------------------------------------------------------------------------------------------------------|
| Plan2Explore                     | False                                                                                                             |
| Exploration Intrinsic Scale      | 0.9                                                                                                               |
| Exploration Extrinsic Scale      | 0.1                                                                                                               |
| Exploration Optimization         | Optimization: Adam<br>Learning Rate: 3e-4<br>Epsilon: 1e-5<br>Clip: 100                                           |
| Exploration Head                 | Weight Decay: 1e-6<br>Layers: [512, 512, 512, 512]<br>Activation: ELU<br>Normalization: None<br>Distribution: MSE |
| Exploration Reward Normalization | Momentum: 1.0<br>Scale: 1.0<br>Epsilon: 1e-8                                                                      |
| Disaggregation Target            | Stochastic                                                                                                        |
| Disaggregation Log               | False                                                                                                             |
| Disaggregation Models            | 10                                                                                                                |
| Disaggregation Offset            | 1                                                                                                                 |
| Disaggregation Action Condition  | True                                                                                                              |
| Exploration Model Loss           | KL                                                                                                                |

Table 6: PTMae Hyperparameters

| Parameter                       | Value |
|---------------------------------|-------|
| MAE Image Width Size            | 224   |
| MAE Image Height Size           | 224   |
| WM Flat VIT Image Height Size   | 7     |
| WM Flat VIT Image Width Size    | 7     |
| MAE State Prediction            | False |
| WM Flat VIT Input Channels      | 768   |
| WM Flat VIT Embedding Dimension | 128   |
| MAE Average                     | True  |



Table 7: MAE Hyperparameters

| Parameter       | Value                            |
|-----------------|----------------------------------|
| Camera Keys     | ‘image front image wrist’        |
| Mask Ratio      | 0.95                             |
| MAE             | Image Height Size: 128           |
|                 | Image Width Size: 128            |
|                 | Patch Size: 16                   |
|                 | Embedding Dimension: 256         |
|                 | Depth: 8                         |
|                 | Number of Heads: 4               |
|                 | Decoder Embedding Dimension: 256 |
|                 | Decoder Depth: 6                 |
|                 | Decoder Number of Heads: 4       |
|                 | Reward Prediction: True          |
|                 | Early Convolution: True          |
|                 | State Prediction: True           |
|                 | Input Channels: 3                |
|                 | Number of Cameras: 0             |
|                 | State Dimension: 10              |
|                 | View Masking: True               |
| WM Flat VIT     | Control Input: ‘front wrist’     |
|                 | Image Height Size: 8             |
|                 | Image Width Size: 8              |
|                 | Patch Size: 1                    |
|                 | Embedding Dimension: 128         |
|                 | Depth: 2                         |
|                 | Number of Heads: 4               |
|                 | Decoder Embedding Dimension: 128 |
|                 | Decoder Depth: 2                 |
|                 | Decoder Number of Heads: 4       |
| Image Time Size | 4                                |
|                 | Use ImageNet MAE                 |
|                 | False                            |
|                 | MAE Chunk                        |
| MAE Average     | 1                                |
|                 | False                            |

Table 8: World Model Hyperparameters

| Parameter           | Value                                                                                                                                                                                                       |
|---------------------|-------------------------------------------------------------------------------------------------------------------------------------------------------------------------------------------------------------|
| Grad Heads          | [Reward, Discount]                                                                                                                                                                                          |
| Predictive Discount | True                                                                                                                                                                                                        |
| RSSM                | Action Free: False<br>Hidden: 1024<br>Deterministic: 1024<br>Stochastic: 32<br>Discrete: 32<br>Activation: ELU<br>Normalization: None<br>Stochastic Activation: Sigmoid2<br>Minimum Standard Deviation: 0.1 |
| Reward Head         | Layers: [512, 512, 512, 512]<br>Activation: ELU<br>Normalization: None                                                                                                                                      |
| Discount Head       | Distribution: Symlog<br>Layers: [512, 512, 512, 512]<br>Activation: ELU<br>Normalization: None                                                                                                              |
| Loss Scales         | Distribution: Binary<br>Feature: 1.0<br>KL: 1.0<br>Reward: 1.0<br>Discount: 1.0<br>Proprio: 1.0<br>MAE Reward: 1.0                                                                                          |
| KL                  | Scale: 1.0                                                                                                                                                                                                  |
| KL Minloss          | 0.1                                                                                                                                                                                                         |
| KL Balance          | 0.8                                                                                                                                                                                                         |
| Model Optimization  | Optimization: Adam<br>Learning Rate: 3e-4<br>Epsilon: 1e-5<br>Clip: 100.0<br>Weight Decay: 1e-6<br>Weight Decay Pattern: 'kernel'<br>Warmup: 0                                                              |
| MAE Optimization    | Optimization: Adam<br>Learning Rate: 3e-4<br>Epsilon: 1e-5<br>Clip: 100.0<br>Weight Decay: 1e-6<br>Warmup: 2500                                                                                             |

Table 9: Actor Critic Hyperparameters

| Parameter            | Value                                                                                                                                          |
|----------------------|------------------------------------------------------------------------------------------------------------------------------------------------|
| Actor                | Layers: [512, 512, 512, 512]<br>Activation: ELU<br>Normalization: None<br>Distribution: Trunc_Normal<br>Minimum Standard Deviation: 0.1        |
| Critic               | Layers: [512, 512, 512, 512]<br>Activation: ELU<br>Normalization: None<br>Distribution: MSE                                                    |
| Actor Optimization   | Optimization: Adam<br>Learning Rate: 1e-4<br>Epsilon: 1e-5<br>Clip: 100.0<br>Weight Decay: 1e-6<br>Weight Decay Pattern: 'kernel'<br>Warmup: 0 |
| Critic Optimization  | Optimization: Adam<br>Learning Rate: 1e-4<br>Epsilon: 1e-5<br>Clip: 100.0<br>Weight Decay: 1e-6<br>Weight Decay Pattern: 'kernel'<br>Warmup: 0 |
| Discount             | 0.99                                                                                                                                           |
| Discount Lambda      | 0.95                                                                                                                                           |
| Image Horizon        | 15                                                                                                                                             |
| Actor Grad           | Dynamics                                                                                                                                       |
| Actor Grad Mix       | 0.1                                                                                                                                            |
| Actor Entropy        | Scale: 1e-4                                                                                                                                    |
| Slow Target          | True                                                                                                                                           |
| Slow Target Update   | 100                                                                                                                                            |
| Slow Target Fraction | 1                                                                                                                                              |
| Slow Baseline        | True                                                                                                                                           |
| Reward Normalization | Momentum: 0.99<br>Scale: 1.0<br>Epsilon: 1e-8                                                                                                  |

Table 10: Random Network Distillation Hyperparameters

| Parameter           | Value                                                                                             |
|---------------------|---------------------------------------------------------------------------------------------------|
| Embedding Dimension | 512                                                                                               |
| Hidden Dimension    | 256                                                                                               |
| Optimizer           | Adam<br>Learning Rate: 3e-4<br>Epsilon: 1e-5<br>Clip: 100.0<br>Weight Decay: 1e-6<br>Warmup: 2500 |
